# Supplementary material for: Asymmetric synthesis of stable α-aminoboronic esters catalyzed by N-heterocylic carbene and copper(i) chloride
Source: Royal Society of Chemistry journal article supplement (doi:10.1039/c4ra02229g), 2014-01-01

# Supporting Information

## Asymmetric Synthesis of Stable $\alpha$ -Aminoboronic Esters Catalyzed by N-Heterocyclic Carbene and Copper (I) Chloride

**Jinbo Chen, Ling-yan Chen, Yue Zheng and Zhihua Sun\***

College of Chemistry and Chemical Engineering, Shanghai University of Engineering Science,

333 Longteng Road, Shanghai 201620, China

E-mail: [sungaris@gmail.com](mailto:sungaris@gmail.com)

## **Table of Contents**

|                                                                         |     |
|-------------------------------------------------------------------------|-----|
| General Information                                                     | S3  |
| Synthetic procedures for <b>5a-j</b>                                    | S3  |
| Determination of diastereomeric ratio                                   | S7  |
| Synthesis of <b>7</b> and <b>8</b>                                      | S13 |
| X-ray crystal structure of <b>5b'</b>                                   | S14 |
| <sup>1</sup> H NMR, <sup>13</sup> C NMR and <sup>19</sup> F NMR spectra | S15 |

## General Information

Chemicals and solvents were either purchased from commercial suppliers or purified by standard techniques. Benzene was treated with sodium. CuCl was purified by standard techniques.  $^1\text{H}$  NMR,  $^{13}\text{C}$  NMR and  $^{19}\text{F}$  NMR spectra were recorded on Bruker 400 instruments. Chemical shifts are given in  $\delta$  relative to tetramethylsilane (TMS), the coupling constants are given in Hz. High-resolution mass spectra were recorded on an Ion Spec Fourier Transform. High-resolution mass spectra were recorded on a Shimadzu Liquid Chromatograph Mass Spectrometer (LCMS-IT-TOF).

## Synthetic procedures for 5a-j

A representative procedure with ligand precursor **3** for product **5a** is described below:

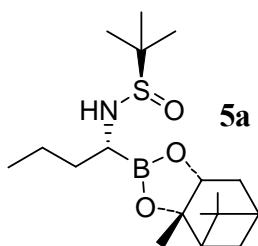

Under argon, ligand precursor **3** (0.2 mmol) was mixed with CuCl (0.2 mmol), NaOBu-*t* (0.2 mmol) in 10 mL benzene. The mixture was stirred at room temperature for 4 h, during which time, the reaction solution turned from colorless to green then to light black color. To this, was then added N-*t*-butylsulfinyl butaldimine (2.0 mmol) in 5 mL benzene and bis(pinanediolato)diboron (2.0 mmol) in 5 mL benzene. The reaction was stirred at room temperature for 48 h. Then the solution was diluted with 30 mL ethyl acetate and quenched with saturated  $\text{K}_2\text{CO}_3$  solution. After separation and washing the aqueous layer with ethyl acetate ( $2 \times 30$  mL), the combined organic solution was dried over anhydrous  $\text{Na}_2\text{SO}_4$ , and then concentrated. Purification using flash column chromatography ( $\text{CH}_2\text{Cl}_2/\text{MeOH}$  as eluent) gave **5a**. Yield: 92%. IR (neat): 2939, 2871, 1491, 1380, 1363, 1077, 1021  $\text{cm}^{-1}$ .  $^1\text{H}$ -NMR (400 MHz,  $\text{DMSO}-d_6$ )  $\delta$  4.76 (d,  $J = 6.8$  Hz, 1H), 4.34 (dd,  $J_1 = 2.0$  Hz,  $J_2 = 8.8$  Hz, 1H), 2.82(m, 1H), 2.30(m, 1H), 2.16(m, 1H), 1.97(m, 1H), 1.87(m, 1H), 1.71(m, 1H), 1.56(m, 2H), 1.34(m, 2H), 1.32(s, 3H), 1.25(s, 3H), 1.13(m, 1H), 1.08(s, 9H), 0.87(t,  $J = 7.2$  Hz, 3H), 0.82(s, 3H).  $^{13}\text{C}$ -NMR (100 MHz,  $\text{DMSO}-d_6$ )  $\delta$  85.9,

77.4, 55.7, 51.2, 38.3, 35.5, 35.5, 28.8, 27.3, 26.4, 24.1, 23.1, 20.1, 14.5. HRMS (ESI-TOF)  $m/z$ :  $[M+H]^+$  calcd for  $C_{18}H_{35}BNO_3S$  356.2352, found 356.2359.

Following the procedure described above, the following compounds were obtained:

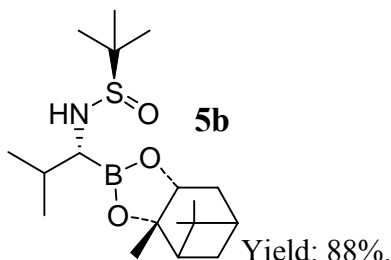

IR (neat): 2924, 2871, 1463, 1390, 1376, 1066, 1046  $cm^{-1}$ .  $^1H$ -NMR (400 MHz,  $DMSO-d_6$ )  $\delta$  4.73(d,  $J = 6.4$  Hz, 1H), 4.34(m, 1H), 2.66(t,  $J = 6.4$  Hz, 1H), 2.32(m, 1H), 2.16(m, 1H), 1.98(m, 1H), 1.87(m, 2H), 1.70(m, 1H), 1.32(s, 3H), 1.25(s, 3H), 1.18(m, 1H), 1.09(s, 9H), 0.92(d,  $J = 7.2$  Hz, 6H), 0.82(s, 3H).  $^{13}C$ -NMR (100 MHz,  $DMSO-d_6$ )  $\delta$  86.0, 77.4, 55.9, 51.2, 38.3, 35.5, 31.2, 28.9, 27.3, 26.5, 24.2, 23.0, 20.8, 20.0. HRMS (ESI-TOF)  $m/z$ :  $[M+H]^+$  calcd for  $C_{18}H_{35}BNO_3S$  356.2352, found 356.2361.

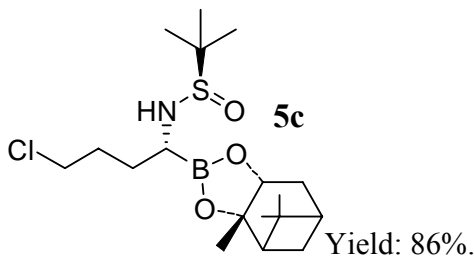

IR (neat): 2925, 2870, 1464, 1376, 1078, 1041, 1029  $cm^{-1}$ .  $^1H$ -NMR (400 MHz,  $DMSO-d_6$ )  $\delta$  4.90 (d,  $J = 6.4$  Hz, 1H), 4.36 (dd,  $J_1 = 2.0$  Hz,  $J_2 = 6.8$  Hz, 1H), 3.63 (t,  $J = 6.4$  Hz, 2H), 2.85 (t,  $J = 7.2$  Hz, 1H), 2.32 (m, 1H), 2.17 (m, 1H), 1.98 (t,  $J = 5.6$  Hz, 1H), 1.88 (m, 1H), 1.81(m, 2H), 1.72 (m, 2H), 1.70 (m, 1H), 1.33 (s, 3H), 1.26 (s, 3H), 1.13 (m, 1H), 1.09 (s, 9H), 0.82 (s, 3H).  $^{13}C$ -NMR (100 MHz,  $DMSO-d_6$ )  $\delta$  86.0, 77.5, 55.8, 51.2, 45.9, 38.3, 35.4, 30.6, 30.5, 30.1, 28.8, 27.3, 26.4, 24.1, 23.1. HRMS (ESI-TOF)  $m/z$ :  $[M+H]^+$  calcd for  $C_{18}H_{34}BClNO_3S$  390.1963, found 390.1957.

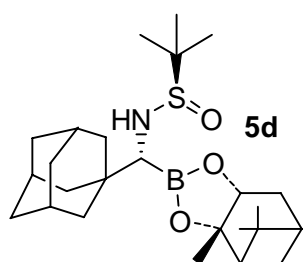

Yield: 80%.

IR (neat): 2911, 2865, 1460, 1376, 1079, 1040 1020  $\text{cm}^{-1}$ .  $^1\text{H-NMR}$  (400 MHz,  $\text{DMSO-}d_6$ )  $\delta$  4.38 (m, 1H), 4.36 (m, 1H), 2.46 (d,  $J = 8.4$  Hz, 1H), 2.33 (m, 1H), 2.18 (m, 1H), 1.99 (t,  $J = 5.6$  Hz, 1H), 1.94 (m, 3H), 1.88 (m, 1H), 1.69 (m, 7H), 1.57 (m, 3H), 1.49 (m, 3H), 1.33 (s, 3H), 1.26 (s, 3H), 1.18 (m, 1H), 1.09 (s, 9H), 0.82 (s, 3H).  $^{13}\text{C-NMR}$  (100 MHz,  $\text{DMSO-}d_6$ )  $\delta$  86.0, 77.3, 56.2, 51.2, 38.3, 37.1, 35.7, 35.6, 28.9, 28.4, 27.3, 26.6, 24.2, 23.0. HRMS (ESI-TOF)  $m/z$ :  $[\text{M}+\text{H}]^+$  calcd for  $\text{C}_{25}\text{H}_{43}\text{BNO}_3\text{S}$  448.2978, found 448.2967.

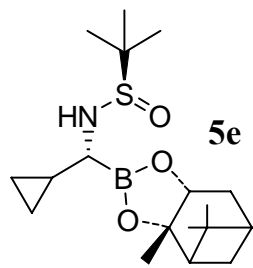

Yield: 78%.

IR (neat): 3076, 2922, 2869, 1377, 1364, 1055, 1029  $\text{cm}^{-1}$ .  $^1\text{H-NMR}$  (400 MHz,  $\text{DMSO-}d_6$ )  $\delta$  0.19 (m, 1H), 0.26 (m, 1H), 0.44 (m, 1H), 0.82 (s, 3H), 0.96 (m, 1H), 1.09 (s, 9H), 1.18 (d,  $J = 10.8$  Hz, 1H), 1.26 (s, 3H), 1.33 (s, 3H), 1.72 (m, 1H), 1.87 (m, 1H), 1.98 (t,  $J = 5.2$  Hz, 1H), 2.16 (m, 1H), 2.24 (dd,  $J_1 = 6.4$  Hz,  $J_2 = 9.2$  Hz, 1H), 2.32 (m, 1H), 4.36 (dd,  $J_1 = 2$  Hz,  $J_2 = 8.8$  Hz, 1H), 4.74 (d,  $J = 6$  Hz, 1H).  $^{13}\text{C-NMR}$  (100 MHz,  $\text{DMSO-}d_6$ )  $\delta$  3.4, 5.5, 14.4, 23.0, 24.1, 26.3, 27.3, 28.8, 35.5, 38.3, 51.2, 55.7, 77.4, 85.9. HRMS (ESI-TOF)  $m/z$ :  $[\text{M}+\text{H}]^+$  calcd for  $\text{C}_{18}\text{H}_{33}\text{BNO}_3\text{S}$  354.2196, found 354.2189.

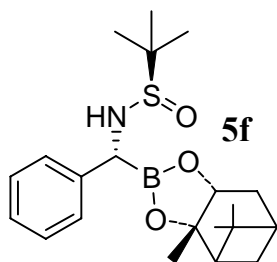

Yield: 86%.

IR (neat): 2920, 2867, 1473, 1394, 1375, 1040, 767, 698  $\text{cm}^{-1}$ .  $^1\text{H-NMR}$  (400 MHz,  $\text{DMSO-}d_6$ )  $\delta$  7.28 (m, 4H), 7.18 (m, 1H), 5.47 (d,  $J = 5.6$  Hz, 1H), 4.34 (m, 1H), 4.13 (d,  $J = 5.6$  Hz, 1H), 2.29 (m, 1H), 2.02 (m, 1H), 1.93 (m, 1H), 1.78 (m, 1H), 1.59 (m, 1H),

1.26(s, 3H), 1.21(s, 3H), 1.13(s, 9H), 0.86(m, 1H), 0.78(s, 3H).  $^{13}\text{C-NMR}$  (100 MHz,  $\text{DMSO-}d_6$ )  $\delta$  141.7, 128.6, 127.7, 126.8, 86.2, 77.7, 56.2, 51.2, 38.3, 35.3, 28.6, 27.2, 26.0, 24.1, 23.1. HRMS (ESI-TOF)  $m/z$ :  $[\text{M}+\text{H}]^+$  calcd for  $\text{C}_{21}\text{H}_{33}\text{BNO}_3\text{S}$  390.2186, found 390.2177.

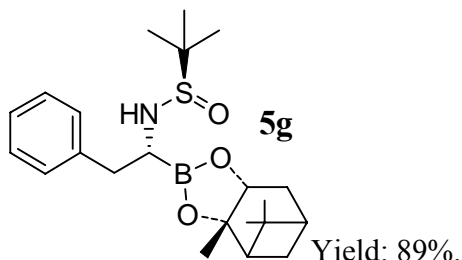

IR (neat): 2922, 2870, 1462, 1375, 1079, 1041, 752, 699  $\text{cm}^{-1}$ .  $^1\text{H-NMR}$  (400 MHz,  $\text{DMSO-}d_6$ )  $\delta$  7.24 (m, 5H), 4.88 (d,  $J = 6.0$  Hz, 1H), 4.23 (m, 1H), 3.12 (m, 1H), 2.96 (m, 1H), 2.85 (m, 1H), 2.25 (m, 1H), 1.93 (m, 1H), 1.88 (m, 1H), 1.78 (m, 1H), 1.64 (m, 1H), 1.24 (s, 3H), 1.21 (s, 3H), 1.08 (s, 9H), 0.80 (m, 1H), 0.77 (s, 3H).  $^{13}\text{C-NMR}$  (100 MHz,  $\text{DMSO-}d_6$ )  $\delta$  139.2, 129.6, 128.6, 126.7, 86.0, 77.5, 55.7, 51.1, 38.2, 35.2, 28.6, 27.3, 26.1, 24.1, 23.0. HRMS (ESI-TOF)  $m/z$ :  $[\text{M}+\text{H}]^+$  calcd for  $\text{C}_{22}\text{H}_{35}\text{BNO}_3\text{S}$  404.2352, found 404.2369.

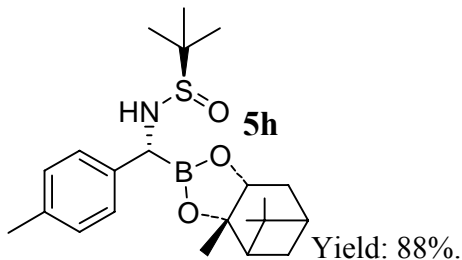

IR (neat): 2924, 2867, 1465, 1393, 1061, 820, 725  $\text{cm}^{-1}$ .  $^1\text{H-NMR}$  (400 MHz,  $\text{DMSO-}d_6$ )  $\delta$  7.23 (d,  $J = 8.0$  Hz, 2H), 7.10 (d,  $J = 7.6$  Hz, 2H), 5.34 (d,  $J = 5.6$  Hz, 1H), 4.33 (dd,  $J_1 = 1.6$  Hz,  $J_2 = 8.8$  Hz, 1H), 4.07 (d,  $J = 6.0$  Hz, 1H), 2.27 (m, 1H), 2.27 (s, 3H), 2.03 (m, 1H), 1.93 (m, 1H), 1.79 (m, 1H), 1.64 (m, 1H), 1.25 (s, 3H), 1.21 (s, 3H), 1.12 (s, 9H), 0.89 (m, 1H), 0.79 (s, 3H).  $^{13}\text{C-NMR}$  (100 MHz,  $\text{DMSO-}d_6$ )  $\delta$  138.6, 135.8, 129.2, 127.8, 86.2, 77.7, 56.1, 51.3, 38.3, 35.4, 28.7, 27.2, 26.1, 24.1, 23.1, 21.1. HRMS (ESI-TOF)  $m/z$ :  $[\text{M}+\text{H}]^+$  calcd for  $\text{C}_{22}\text{H}_{35}\text{BNO}_3\text{S}$  404.2352, found 404.2371.

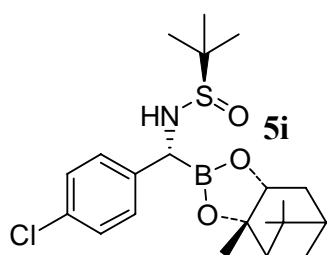

Yield: 90%.

IR (neat): 2924, 2867, 1465, 1393, 1061, 820, 725  $\text{cm}^{-1}$ .  $^1\text{H-NMR}$  (400 MHz,  $\text{DMSO-}d_6$ )  $\delta$  7.38 (m, 4H), 4.23 (m, 1H), 4.17 (m, 1H), 4.14 (m, 1H), 2.28 (m, 1H), 2.18 (m, 1H), 1.93 (m, 1H), 1.86 (m, 1H), 1.70 (m, 1H), 1.30 (s, 3H), 1.25 (s, 3H), 1.14 (s, 9H), 1.13 (m, 1H), 0.81 (s, 3H).  $^{13}\text{C-NMR}$  (100 MHz,  $\text{DMSO-}d_6$ )  $\delta$  139.5, 131.9, 130.0, 128.6, 83.4, 76.1, 55.7, 51.8, 47.7, 38.4, 36.0, 29.0, 27.4, 26.4, 24.1, 23.1. HRMS (ESI-TOF)  $m/z$ :  $[\text{M}+\text{H}]^+$  calcd for  $\text{C}_{21}\text{H}_{32}\text{BClNO}_3\text{S}$  424.1806, found 424.1813.

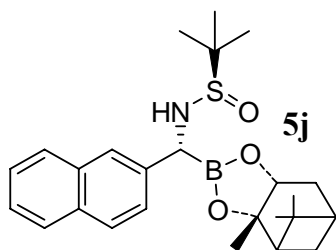

Yield: 85%.

IR (neat): 2927, 2875, 1395, 1075, 820, 758  $\text{cm}^{-1}$ .  $^1\text{H-NMR}$  (400 MHz,  $\text{DMSO-}d_6$ )  $\delta$  7.88 (m, 4H), 7.51 (m, 3H), 4.32 (d,  $J = 8.4$  Hz, 1H), 4.32 (m, 1H), 4.22 (d,  $J = 8.4$  Hz, 1H), 2.28 (m, 1H), 2.18 (m, 1H), 1.93 (m, 1H), 1.87 (m, 1H), 1.67 (m, 1H), 1.30 (s, 3H), 1.25 (s, 3H), 1.17 (s, 9H), 1.13 (m, 1H), 0.81 (s, 3H).  $^{13}\text{C-NMR}$  (100 MHz,  $\text{DMSO-}d_6$ )  $\delta$  138.0, 133.3, 132.7, 128.2, 128.0, 128.0, 126.8, 126.6, 126.5, 126.2, 83.3, 76.1, 55.7, 51.8, 48.7, 48.5, 38.4, 36.0, 29.0, 27.4, 26.4, 24.1, 23.2. HRMS (ESI-TOF)  $m/z$ :  $[\text{M}+\text{H}]^+$  calcd for  $\text{C}_{25}\text{H}_{35}\text{BNO}_3\text{S}$  440.2352, found 440.2365.

The procedure for synthesis of **5b'** is the same as the above of products (**5a-j**). (S)-N-*t*-butylsulfinyl butaldimine was used.

### Determination of diastereomer ratio

The crude sulfinyl protected  $\alpha$ -amino boronic esters were dissolved in dioxane (0.2 M) in an oven-dried vial equipped with a Teflon coated stir bar under nitrogen. Freshly distilled MeOH (10 equiv) was added to the solution, followed by the drop-wise addition of 2.2 M HCl in dioxane (1 equiv). The reaction mixture was stirred at 0  $^\circ\text{C}$  for 1.5 h to 2

h before it was directly concentrated under reduced pressure. Diastereomer ratio (dr) was determined from the  $^1\text{H-NMR}$  of the crude amine hydrochloride salt.

### Selected examples

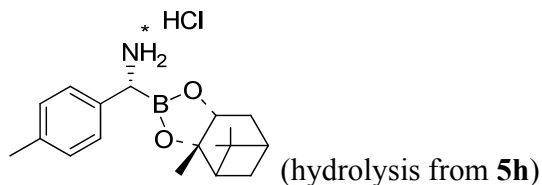

$^1\text{H-NMR}$  (400 MHz, DMSO-*d*<sub>6</sub>)  $\delta$  0.81(s, 3H), 0.91(d,  $J = 10.8$ , 1H), 1.23(s, 3H), 1.36(s, 3H), 1.75(m, 1H), 1.85(m, 1H), 1.95(t,  $J = 5.6$  Hz, 1H), 2.06(m, 1H), 2.30(s, 3H), 2.33(m, 1H), 4.01(d,  $J = 5.2$  Hz, 1H), 4.48(d,  $J = 7.6$  Hz, 1H), 7.21(d,  $J = 7.6$  Hz, 2H), 7.30(d,  $J = 8$  Hz, 2H), 8.27(s, 3H).

### Sample with racemic N-tert-butanesulfinyl amine

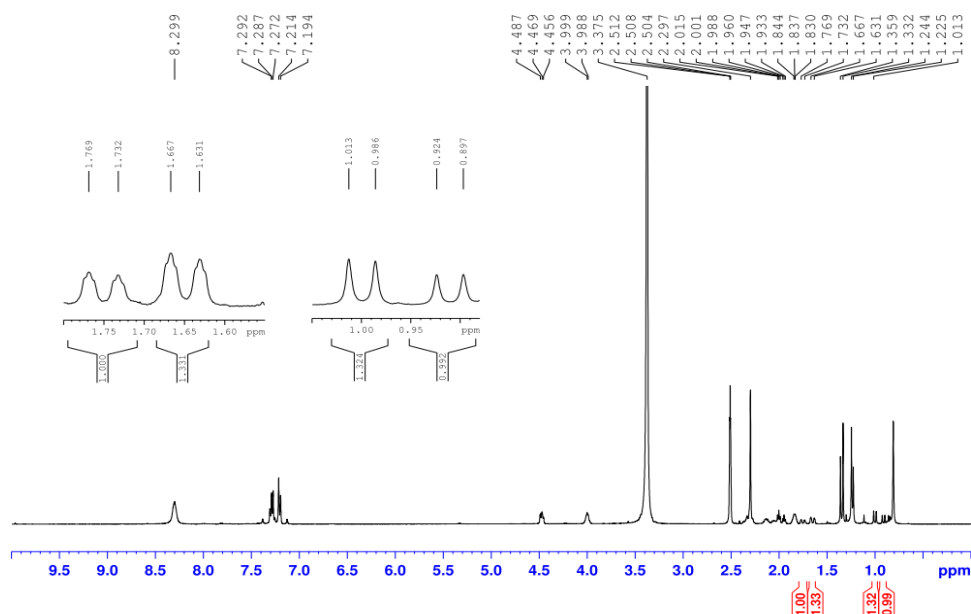

Sample using (R)-N-tert-butanesulfinyl amine dr > 99:1



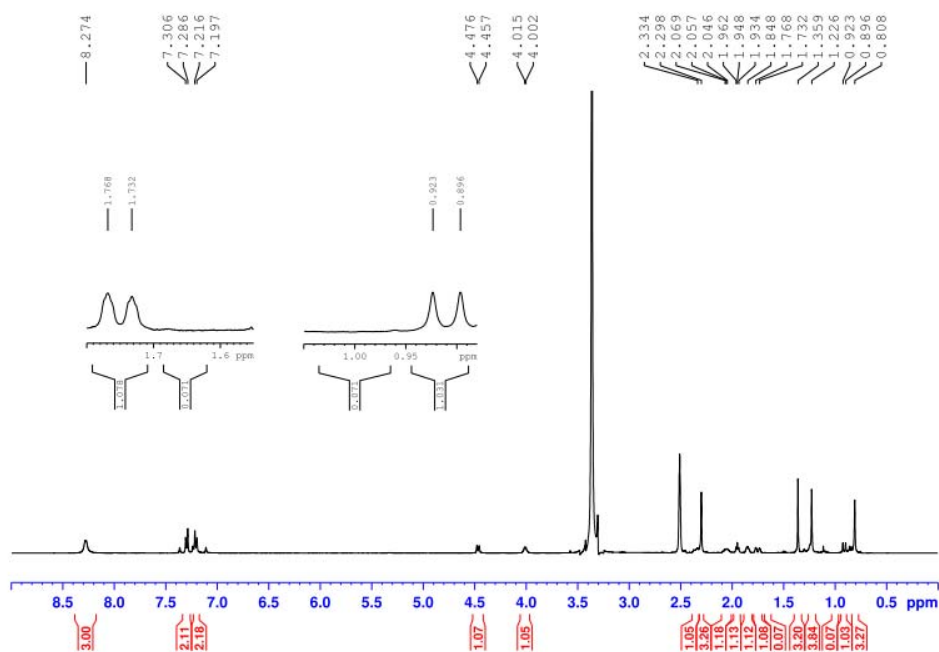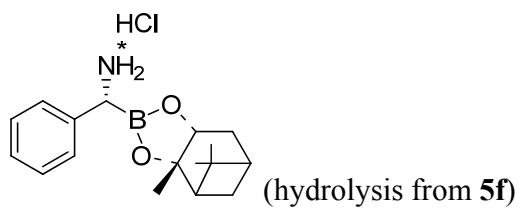

**<sup>1</sup>H-NMR (400 MHz, DMSO-*d*<sub>6</sub>)**  $\delta$  0.81 (s, 3H), 0.88 (d,  $J = 10.8$  Hz, 1H), 1.22 (s, 3H), 1.36 (s, 3H), 1.77 (m, 1H), 1.85(m, 1H), 1.95 (t,  $J = 5.2$  Hz, 1H), 2.01-2.06 (m, 1H), 2.31-2.35 (m, 1H), 4.08 (d,  $J = 5.6$  Hz, 1H), 4.48 (dd,  $J_1 = 2.0$  Hz,  $J_2 = 8.8$  Hz, 1H), 7.34-7.36 (m, 1H), 7.38-7.42 (m, 4H), 8.32 (s, 3H).

**Sample with racemic N-tert-butanesulfinyl amine**

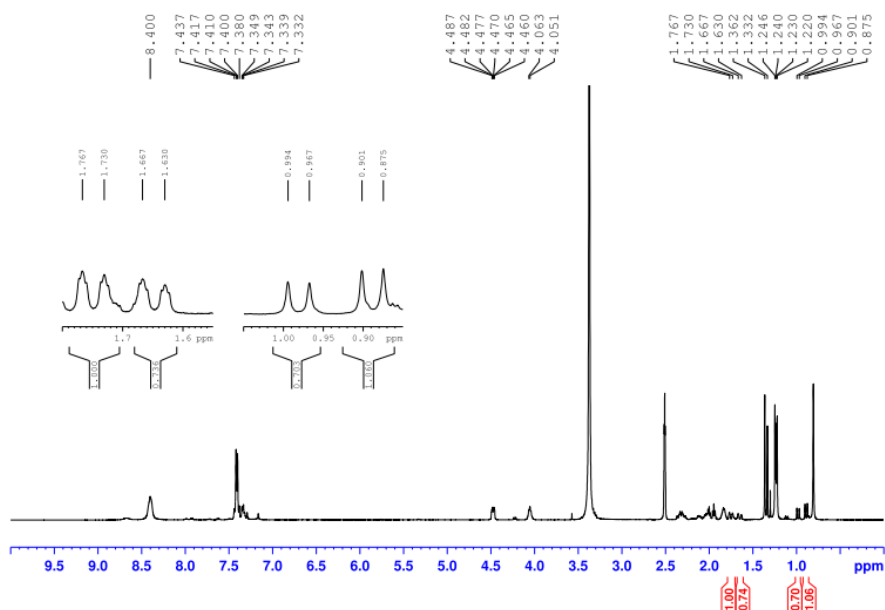

Sample using (R)-N-tert-butanesulfinyl amine dr > 99:1

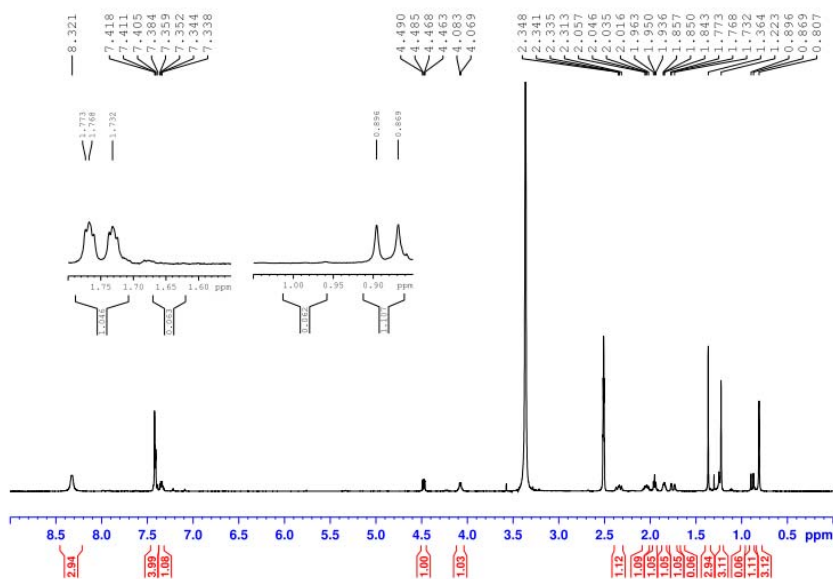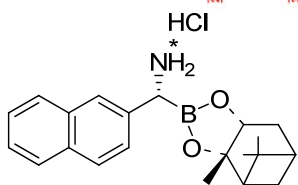

<sup>1</sup>H-NMR (400 MHz, DMSO-*d*<sub>6</sub>) δ 0.81(s, 3H), 0.89(d, *J* = 10.8 Hz, 1H), 1.21(s, 3H), 1.38(s, 3H), 1.77(m, 1H), 1.84(m, 1H), 1.94(t, *J* = 5.2 Hz, 1H), 1.99-2.03(m, 1H), 2.32-2.38(m, 1H), 4.28(s, 1H), 4.48(m, 1H), 7.55-7.58(m, 3H), 7.88-7.98(m, 4H), 8.42(s, 3H).

Sample with racemic N-tert-butanesulfinyl amine

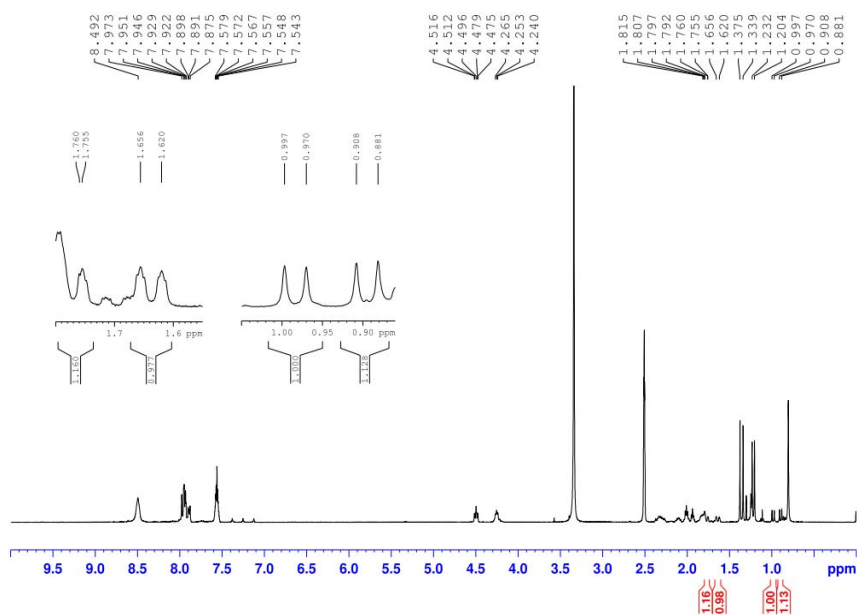

Sample using (R)-N-tert-butanesulfinyl amine dr > 99:1

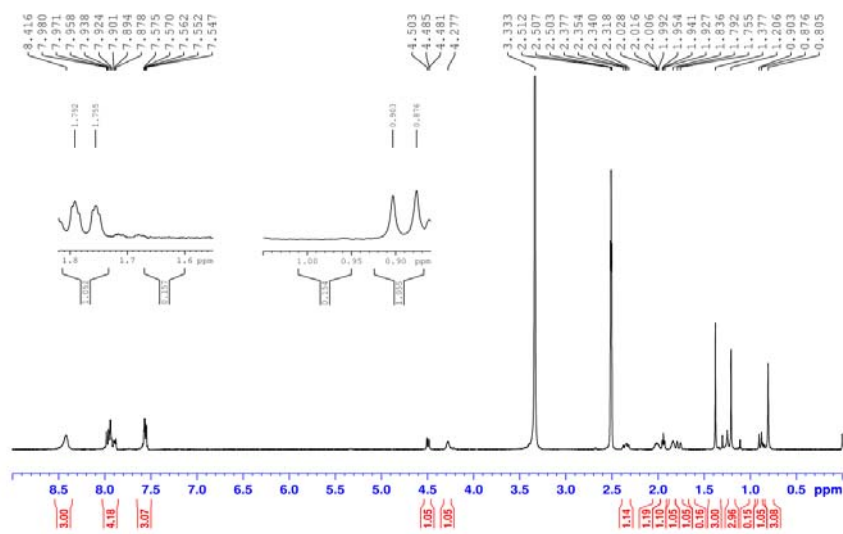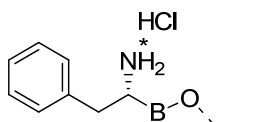

(hydrolysis from **5g**)

<sup>1</sup>H-NMR (400 MHz, DMSO-*d*<sub>6</sub>) δ 0.80(s, 3H), 0.96(d, *J* = 10.8 Hz, 1H), 1.24(s, 3H), 1.32(s, 3H), 1.71(m, 1H), 1.85(m, 1H), 1.94(t, *J* = 5.2 Hz, 1H), 2.06-2.12(m, 1H), 2.28-



2.35(m, 1H), 4.14(d,  $J = 5.2$  Hz, 1H), 4.47(dd,  $J_1 = 2.0$  Hz,  $J_2 = 8.8$  Hz, 1H), 7.44(d,  $J = 8.8$  Hz, 2H), 7.49(d,  $J = 8.8$  Hz, 2H), 8.36(s, 3H).

Sample with racemic N-tert-butanesulfinyl amine

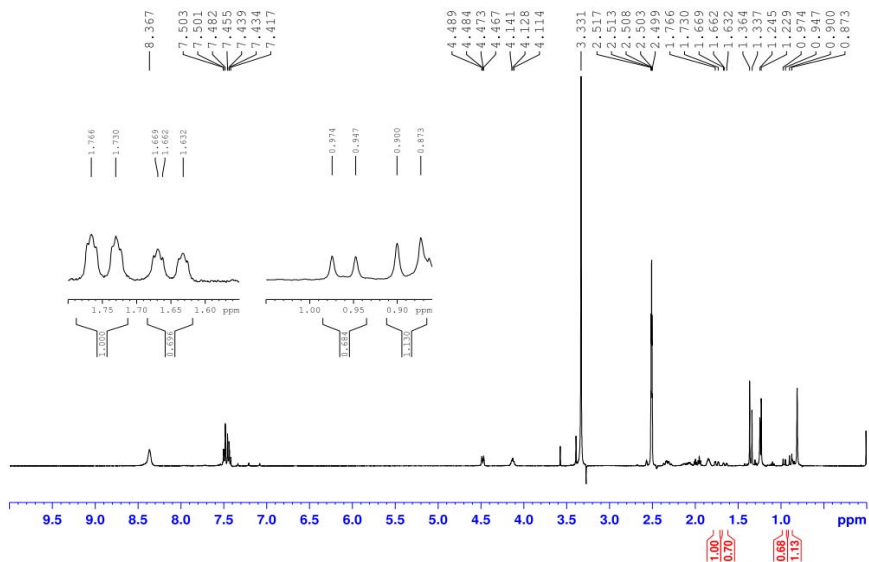

Sample using (R)-N-tert-butanesulfinyl amine dr > 99:1

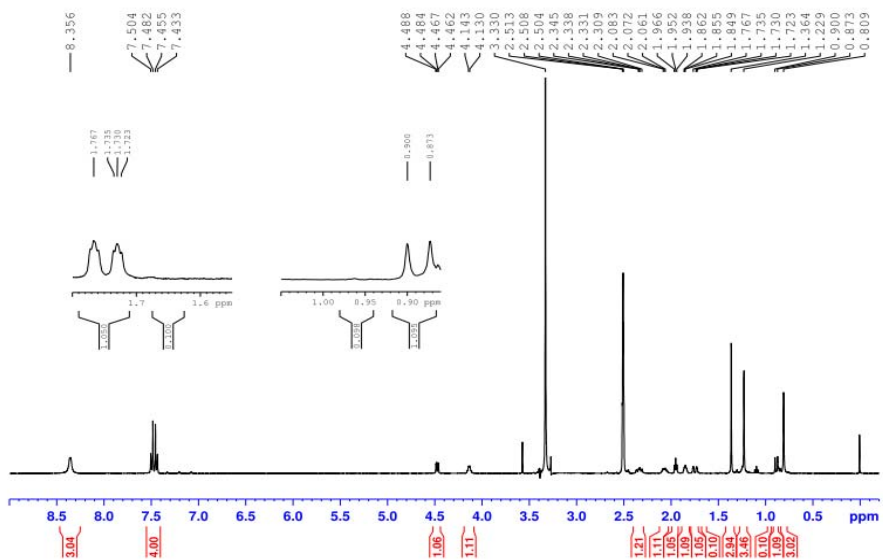

Synthesis of 7 and 8

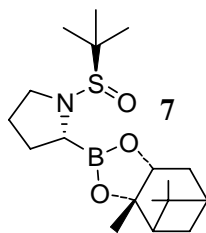

Under argon, to a solution of compound **5c** (2.0 mmol) in 10 mL DMF was added NaOBu-*t* (2.1 mmol). The mixture was stirred at room temperature for 6 h. Then it was quenched with 30 ml ethyl acetate and 30 mL water. The aqueous layer was further extracted with ethyl acetate (2 × 30 mL). The combined organic layer was dried over Na<sub>2</sub>SO<sub>4</sub>, and then concentrated. Purification using water inactivated silica gel (CH<sub>2</sub>Cl<sub>2</sub>/MeOH as eluent) gave **7**. Yield: 83%.

IR (neat): 2922, 2868, 1462, 1375, 1075, 1050, 1026 cm<sup>-1</sup>. <sup>1</sup>H-NMR (400 MHz, DMSO-*d*<sub>6</sub>) δ 4.36 (dd, *J*<sub>1</sub> = 2.0 Hz, *J*<sub>2</sub> = 6.8 Hz, 1H), 3.62 (m, 2H), 2.84 (m, 1H), 2.32 (m, 1H), 2.17 (m, 1H), 1.98 (t, *J* = 5.6 Hz, 1H), 1.88 (m, 1H), 1.81 (m, 2H), 1.72 (m, 2H), 1.70 (m, 1H), 1.33 (s, 3H), 1.26 (s, 3H), 1.13 (m, 1H), 1.09 (s, 9H), 0.82 (s, 3H). <sup>13</sup>C-NMR (100 MHz, DMSO-*d*<sub>6</sub>) δ 86.0, 77.5, 55.8, 51.2, 45.9, 38.3, 35.4, 30.6, 30.5, 30.1, 28.8, 27.3, 26.4, 24.1, 23.1. HRMS (ESI-TOF) *m/z*: [M+H]<sup>+</sup> calcd for C<sub>18</sub>H<sub>33</sub>BNO<sub>3</sub>S 354.2196, found 354.2190.

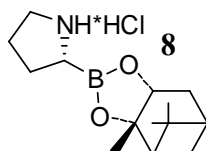

Compound **7** (1 mmol) was diluted with 1,4-dioxane (4.7 mL) under a stream of nitrogen. Methanol (9.97 mmol) was added at room temperature followed by the addition of 4.0M HCl (solution in 1,4-dioxane) (0.994 mmol). The resulting mixture was stirred at room temperature for 0.5h before it was concentrated to dryness. The resulting solid was triturated with a 2:1 mixture of hexanes: Et<sub>2</sub>O to obtain the desired product as a white solid **8**. Yield: 90%. <sup>1</sup>H-NMR (400 MHz, CDCl<sub>3</sub>) δ 4.43 (d, *J* = 9 Hz, 1H) 3.42 (m, 2H), 3.22 (m, 1H), 2.38-1.83 (m, 10H), 1.45 (s, 3H), 1.30 (s, 3H), 1.13 (m, 1H), 0.83 (s, 3H).

## X-ray crystal structure of **5b'**

The **5b'** crystal structure has been deposited at the Cambridge Crystallographic Data Centre and was assigned the deposition number : CCDC 901852

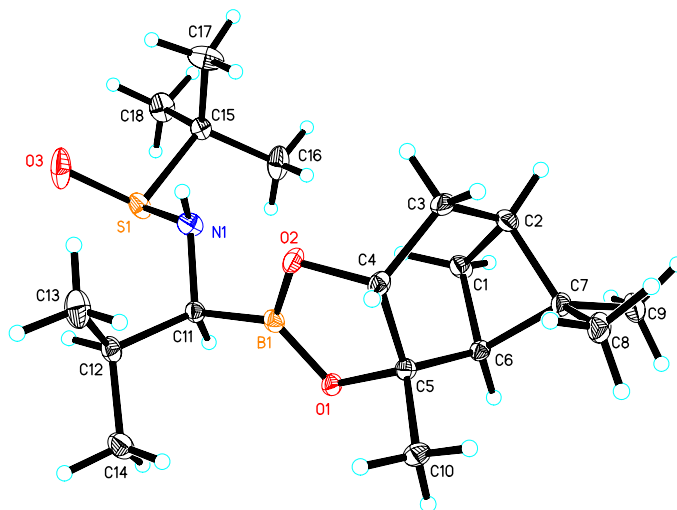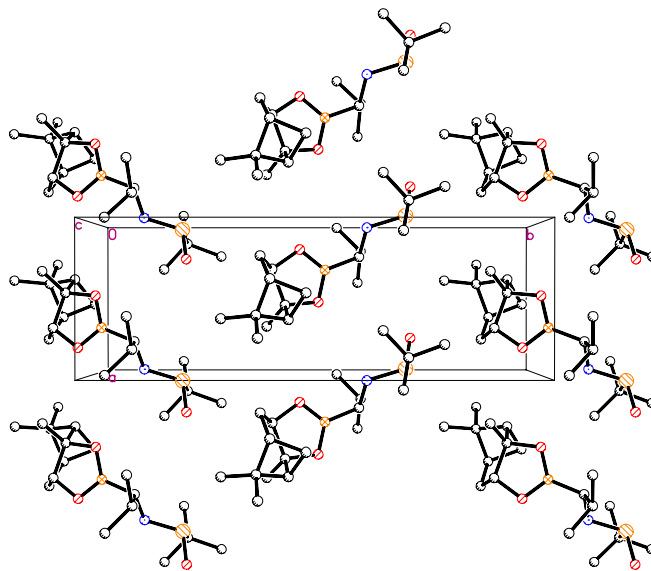

# <sup>1</sup>H NMR, <sup>13</sup>C NMR and <sup>19</sup>F NMR spectra

## spectra

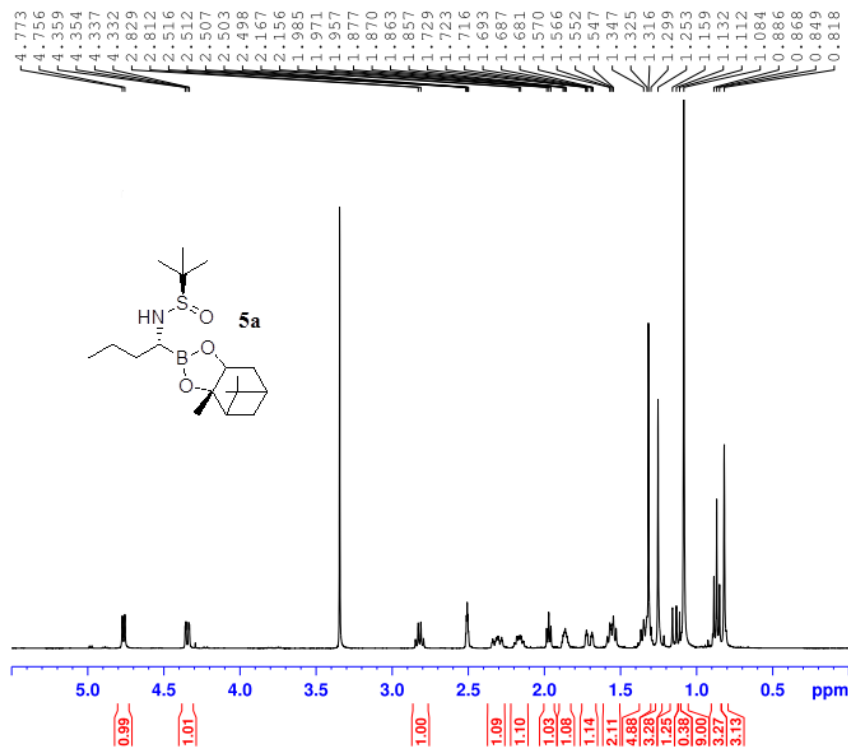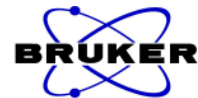

```

NAME          ZT20120314
EXPNO         1
PROCNO        1
Date_         20120314
Time          15.22
INSTRUM       spect
PROBHD        5 mm PABBO BB-
PULPROG       zg30
TD            65536
SOLVENT       DMSO
NS            16
DS            2
SWH           823.685 Hz
FIDRES        0.125483 Hz
AQ            3.9846387 sec
RG            80.6
DW            60.800 usec
DE            6.50 usec
TE            293.9 K
D1            1.00000000 sec
TD0           1

===== CHANNEL f1 =====
NUC1          1H
P1            12.86 usec
PL1           -4.00 dB
PL1W          20.19063568 W
SFO1          400.1324710 MHz
SI            32768
SF            400.1300000 MHz
WDW           EM
SSB           0
LB            0.30 Hz
GB            0
PC            1.00
    
```

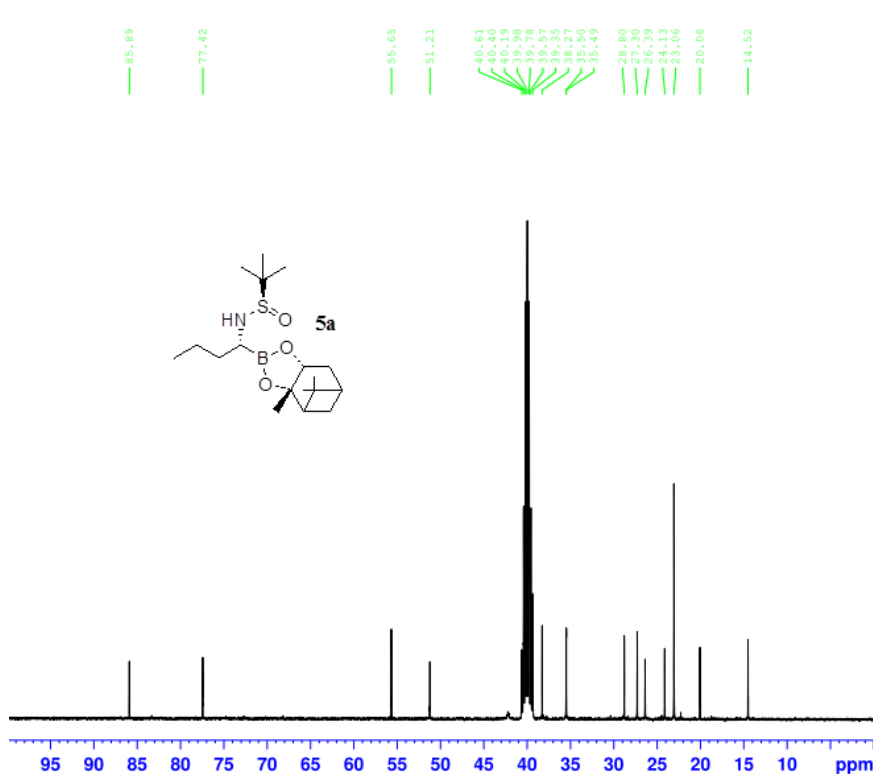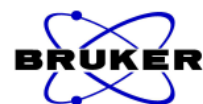

```

NAME          ZT20120314-C
EXPNO         1
PROCNO        1
Date_         20120314
Time          18.41
INSTRUM       spect
PROBHD        5 mm PABBO BB-
PULPROG       zgpg30
TD            65536
SOLVENT       DMSO
NS            1696
DS            4
SWH           24038.461 Hz
FIDRES        0.366798 Hz
AQ            1.3631988 sec
RG            645
DW            20.800 usec
DE            6.50 usec
TE            297.3 K
D1            2.00000000 sec
D11           0.03000000 sec
TD0           1

===== CHANNEL f1 =====
NUC1          13C
P1            10.10 usec
PL1           -3.00 dB
PL1W          64.15196228 W
SFO1          100.6228298 MHz

===== CHANNEL f2 =====
CPDPRG2       waltz16
NUC2          1H
PCPD2         80.00 usec
PL2           -4.00 dB
PL12          11.88 dB
PL13          12.00 dB
PL2W          20.19063568 W
PL12W         0.52137470 W
PL13W         0.50716585 W
SFO2          400.1316005 MHz
SI            32768
SF            100.6127690 MHz
WDW           EM
SSB           0
LB            1.00 Hz
GB            0
PC            1.40
    
```



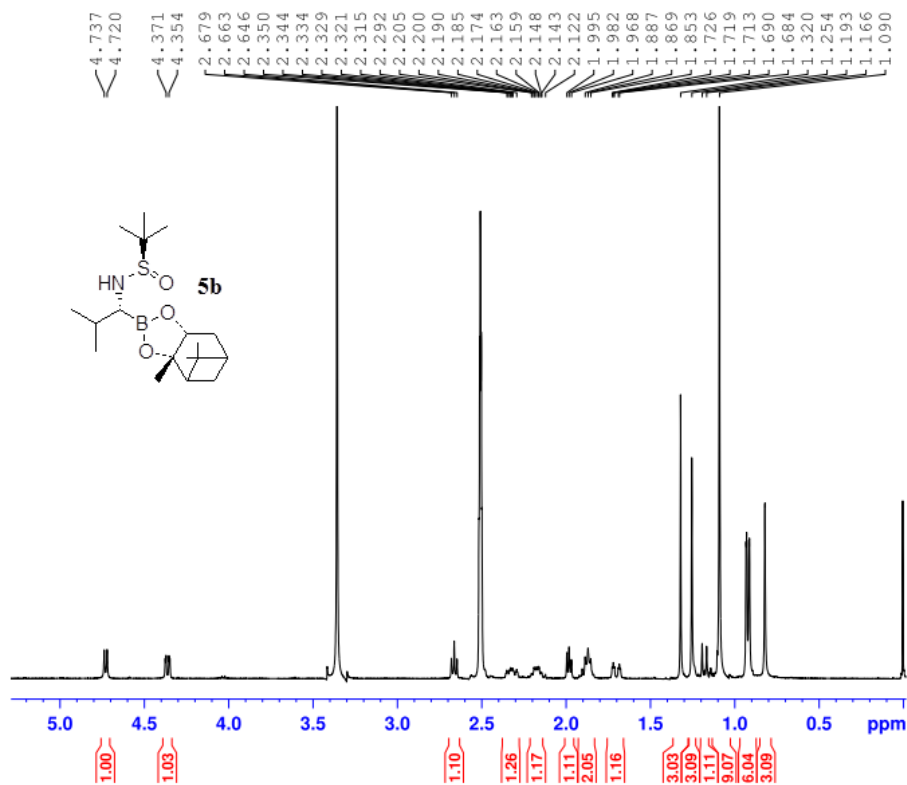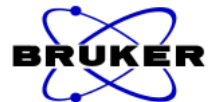

```

NAME      zt-12-01-04-H
EXPNO     1
PROCNO    1
Date_     20120104
Time      21.21
INSTRUM   spect
PROBHD    5 mm PABBO BB-
PULPROG   zg30
TD         65536
SOLVENT   DMSO
NS         80
DS         2
SWH        8223.685 Hz
FIDRES     0.125483 Hz
AQ         3.9846387 sec
RG         287
DW         60.800 usec
DE         6.50 usec
TE         290.5 K
D1         1.00000000 sec
TD0        1

===== CHANNEL f1 =====
NUC1       1H
P1         12.86 usec
PL1        -4.00 dB
PL1W       20.19063568 W
SF01       400.1324710 MHz
SI         32768
SF         400.1300000 MHz
WDW        EM
SSB        0
LB         0.30 Hz
GB         0
PC         1.00
  
```

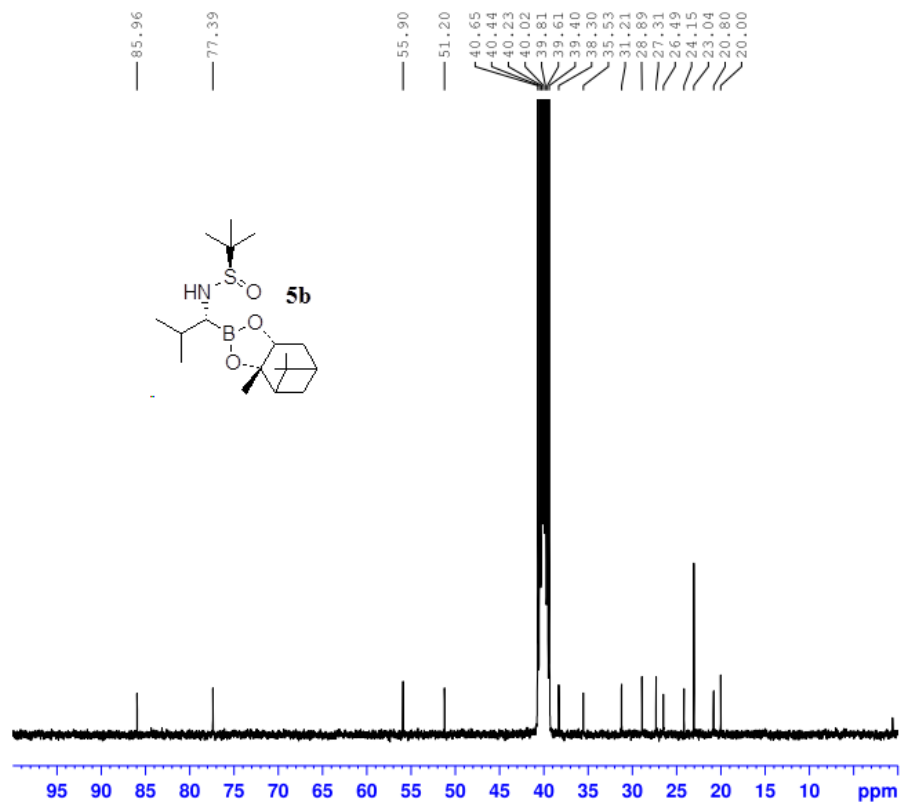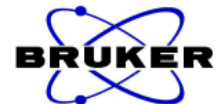

```

NAME      zt-12-01-04-cl3cpd
EXPNO     1
PROCNO    1
Date_     20120105
Time      6.02
INSTRUM   spect
PROBHD    5 mm PABBO BB-
PULPROG   zgpg30
TD         65536
SOLVENT   DMSO
NS         8192
DS         4
SWH        24038.461 Hz
FIDRES     0.366798 Hz
AQ         1.3631988 sec
RG         362
DW         20.800 usec
DE         6.50 usec
TE         295.1 K
D1         2.00000000 sec
D11        0.03000000 sec
TD0        1

===== CHANNEL f1 =====
NUC1       13C
P1         10.10 usec
PL1        -3.00 dB
PL1W       64.15196228 W
SF01       100.6228298 MHz

===== CHANNEL f2 =====
CPDPRG2    waltz16
NUC2       1H
PCPD2      80.00 usec
PL2        -4.00 dB
PL12       11.88 dB
PL13       12.00 dB
PL2W       20.19063568 W
PL12W      0.52137470 W
PL13W      0.50716585 W
SF02       400.1316005 MHz
SI         32768
SF         100.6127690 MHz
WDW        EM
SSB        0
LB         1.00 Hz
GB         0
PC         1.40
  
```

1.910  
1.890  
1.870  
1.855  
1.848  
1.843  
1.847  
1.831  
1.814  
1.828  
1.865  
2.847  
2.830  
2.516  
2.512  
2.507  
2.503  
2.493  
2.321  
2.314  
2.307  
2.285  
2.280  
2.186  
2.182  
2.171  
2.160  
2.155  
1.990  
1.976  
1.962  
1.882  
1.874  
1.867  
1.868  
1.850  
1.835  
1.905  
1.795  
1.774  
1.771  
1.757  
1.744  
1.739  
1.732  
1.723  
1.714  
1.709  
1.696  
1.678  
1.660  
1.627  
1.257  
1.163  
1.137  
1.107  
1.094  
0.821  
0.807

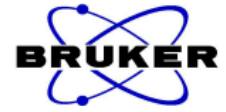

NAME wenkun120309-2-H  
EXPNO 3  
PROCNO 1  
Date\_ 20120409  
Time 13.54  
INSTRUM spect  
PROBHD 5 mm PABBO BB-  
PULPROG zg30  
TD 65536  
SOLVENT DMSO  
NS 64  
DS 2  
SWH 8223.685 Hz  
FIDRES 0.125483 Hz  
AQ 3.9846387 sec  
RG 71.8  
DW 60.800 usec  
DE 6.50 usec  
TE 298.1 K  
D1 1.00000000 sec  
TD0 1

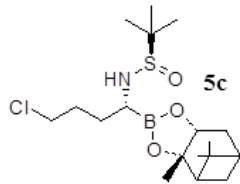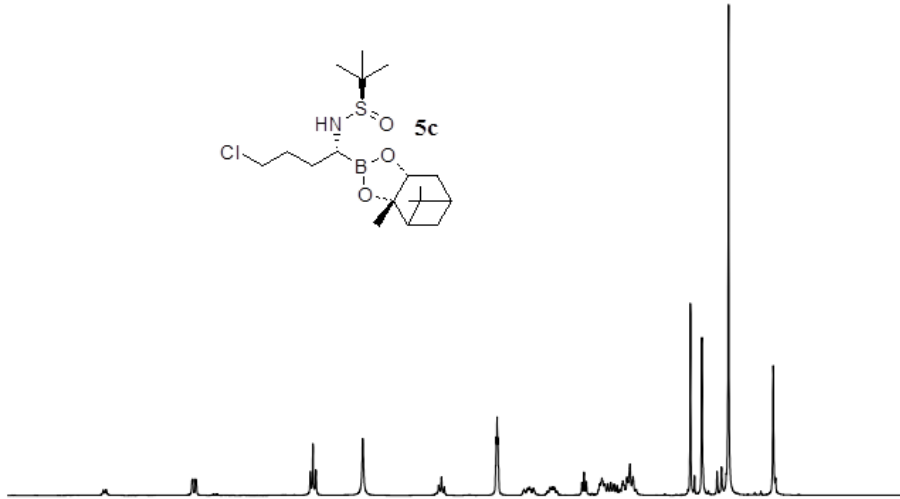

5.0 4.5 4.0 3.5 3.0 2.5 2.0 1.5 1.0 0.5 ppm

0.37 0.98 2.00 0.97 1.09 1.05 0.99 3.12 3.13 2.91 3.34 1.18 9.13 3.00

86.03 77.52 55.75 51.24 45.93 38.27 35.43 30.55 30.11 27.36 26.42 24.11 23.07

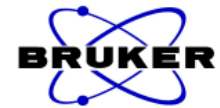

NAME wenkun120309-2-C  
EXPNO 3  
PROCNO 1  
Date\_ 20120409  
Time 15.01  
INSTRUM spect  
PROBHD 5 mm PABBO BB-  
PULPROG zgpg30  
TD 65536  
SOLVENT DMSO  
NS 1071  
DS 4  
SWH 24038.461 Hz  
FIDRES 0.366798 Hz  
AQ 1.3631988 sec  
RG 1030  
DW 20.800 usec  
DE 6.50 usec  
TE 300.1 K  
D1 2.00000000 sec  
D11 0.03000000 sec  
TD0 1

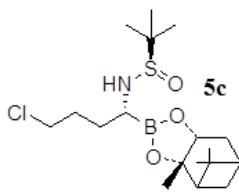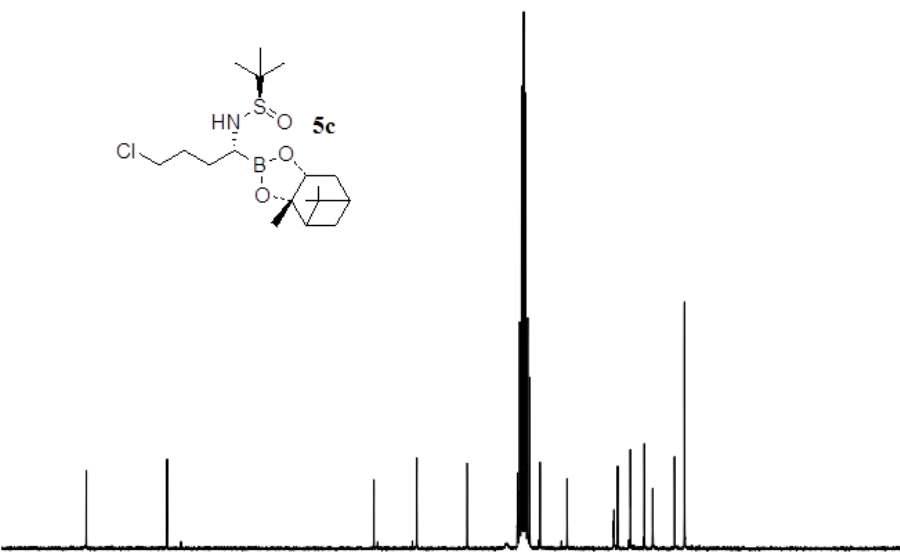

90 85 80 75 70 65 60 55 50 45 40 35 30 25 20 15 10 ppm

===== CHANNEL f1 =====  
NUC1 13C  
P1 10.10 usec  
PL1 -3.00 dB  
PL1W 64.15196228 W  
SF01 100.6228298 MHz

----- CHANNEL f2 -----  
CPDPRG2 waltz16  
NUC2 1H  
PCPD2 80.00 usec  
PL2 -4.00 dB  
PL12 11.88 dB  
PL13 12.00 dB  
PL2W 20.19063568 W  
PL12W 0.52137470 W  
PL13W 0.50716585 W  
SF02 400.1316005 MHz  
SI 32768  
SF 100.6127690 MHz  
WDW EM  
SSB 0  
LB 1.00 Hz  
GB 0  
PC 1.40

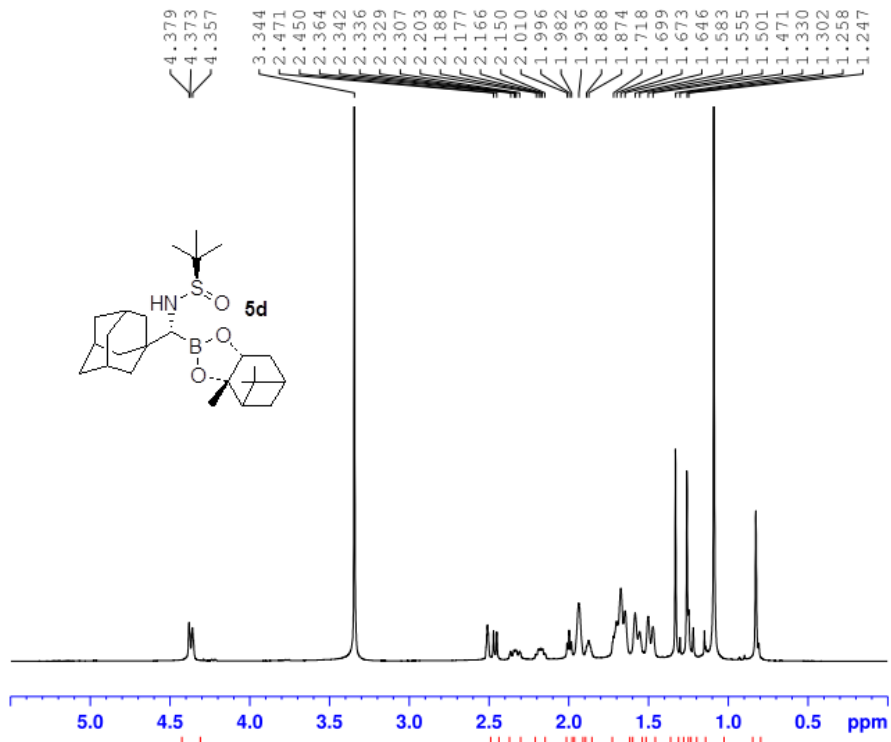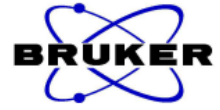

```

NAME wenkun120511-2-H
EXPNO 4
PROCNO 1
Date_ 20120511
Time 12.06
INSTRUM spect
PROBHD 5 mm PABBO BB-
PULPROG zg30
TD 65536
SOLVENT DMSO
NS 16
DS 2
SWH 8223.685 Hz
FIDRES 0.125483 Hz
AQ 3.9846387 sec
RG 64
DW 60.800 usec
DE 6.50 usec
TE 298.2 K
D1 1.0000000 sec
TD0 1

```

```

----- CHANNEL f1 -----
NUC1 1H
P1 12.86 usec
PL1 -4.00 dB
PL1W 20.19063568 W
SF01 400.1324710 MHz
SI 32768
SF 400.1300000 MHz
WDW EM
SSB 0
LB 0.30 Hz
GB 0
PC 1.00

```

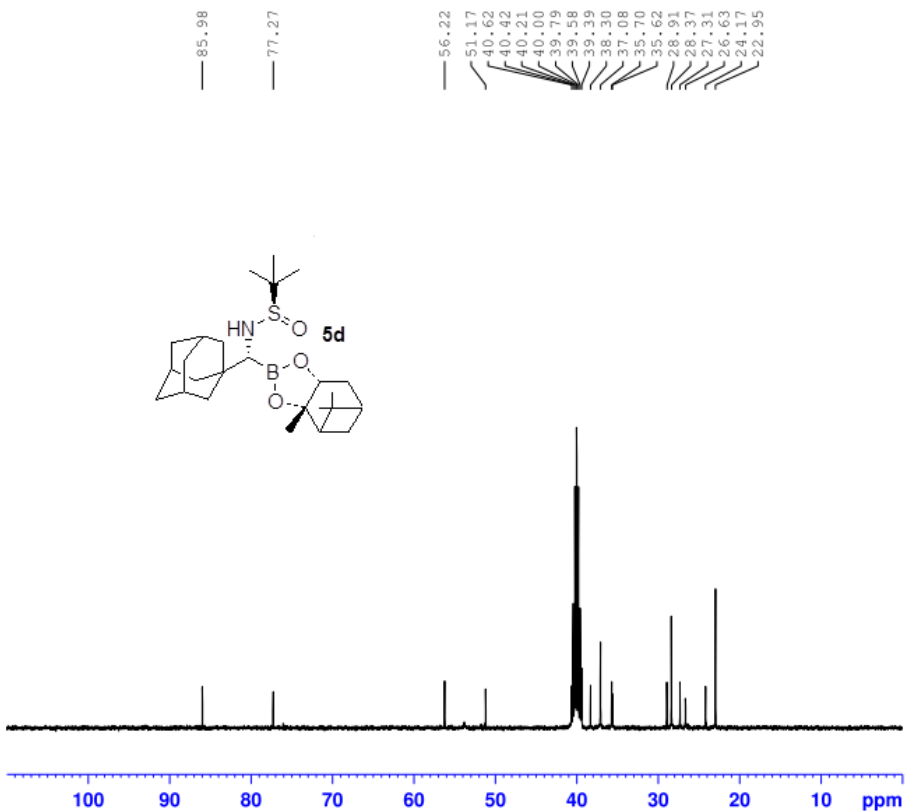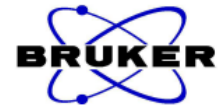

```

NAME wenkun120511-2-C
EXPNO 4
PROCNO 1
Date_ 20120511
Time 12.36
INSTRUM spect
PROBHD 5 mm PABBO BB-
PULPROG zgpg30
TD 65536
SOLVENT DMSO
NS 258
DS 4
SWH 24038.461 Hz
FIDRES 0.366798 Hz
AQ 1.3631988 sec
RG 575
DW 20.800 usec
DE 6.50 usec
TE 300.2 K
D1 2.0000000 sec
D11 0.0300000 sec
TD0 1

```

```

----- CHANNEL f1 -----
NUC1 13C
P1 10.10 usec
PL1 -3.00 dB
PL1W 64.15196228 W
SF01 100.6228298 MHz

----- CHANNEL f2 -----
CPDPRG2 waltz16
NUC2 1H
PCPD2 80.00 usec
PL2 -4.00 dB
PL12 11.88 dB
PL13 12.00 dB
PL2W 20.19063568 W
PL12W 0.52137470 W
PL13W 0.50716585 W
SF02 400.1316005 MHz
SI 32768
SF 100.6127690 MHz
WDW EM
SSB 0
LB 1.00 Hz
GB 0
PC 1.40

```

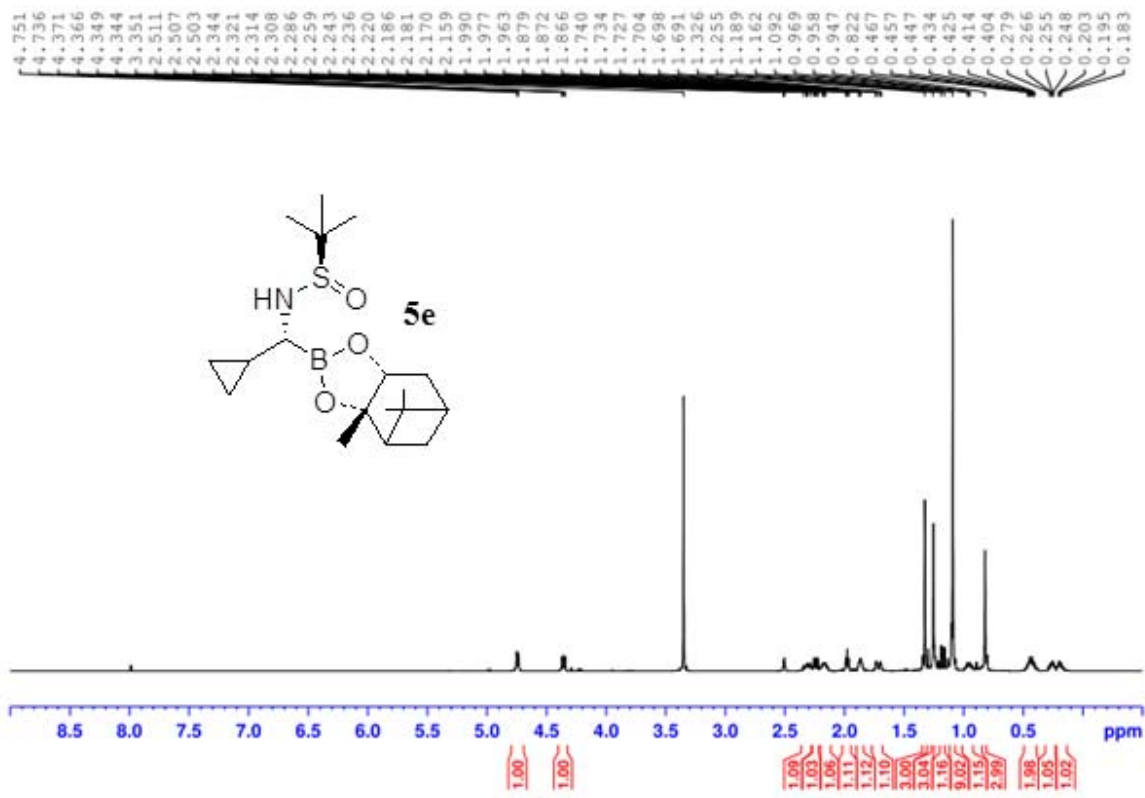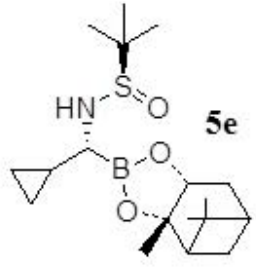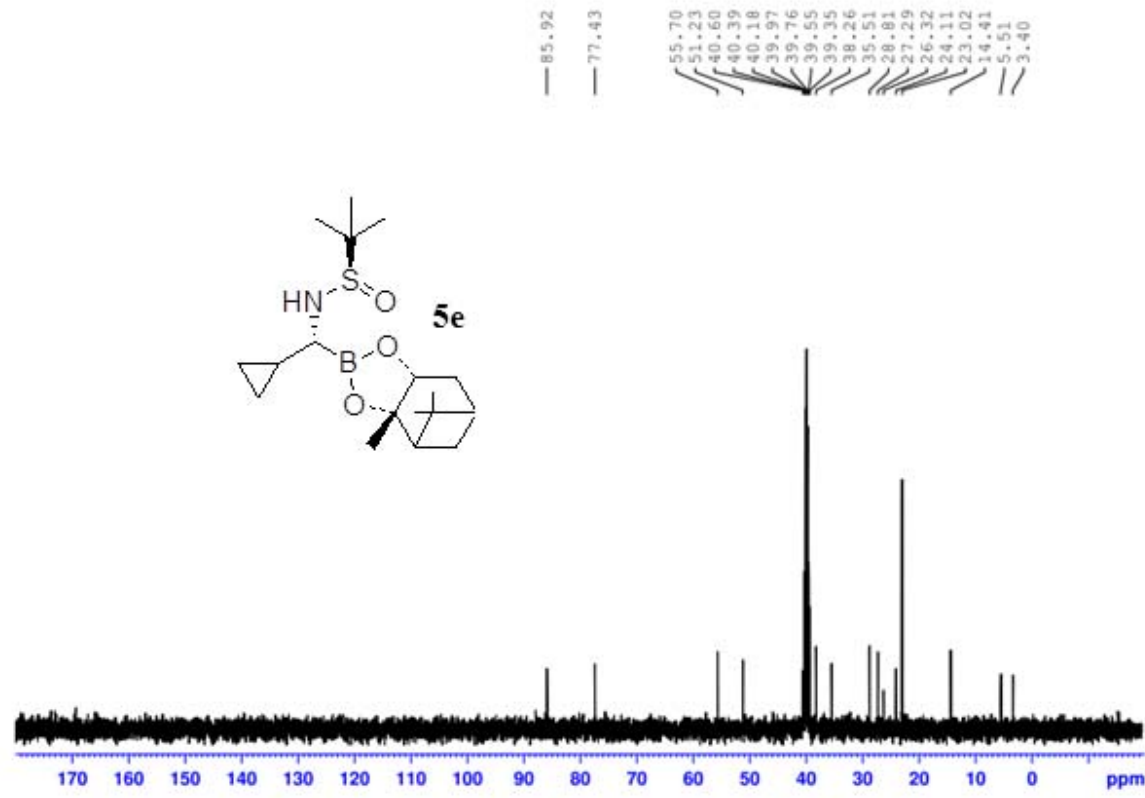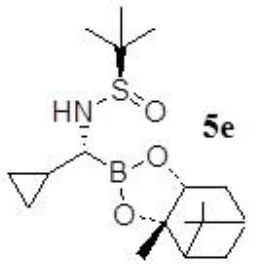



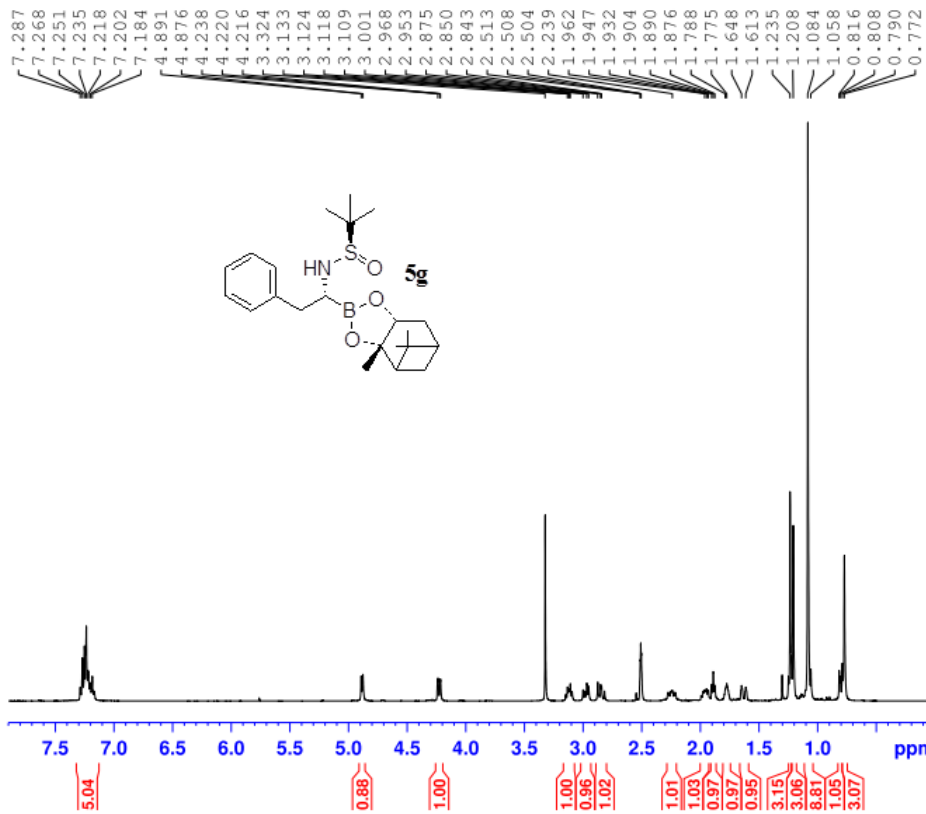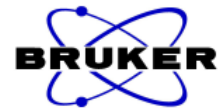

```

NAME wenkun120423-3-H
EXPNO 1
PROCNO 1
Date_ 20120423
Time 16.55
INSTRUM spect
PROBHD 5 mm PABBO BB-
PULPROG zg30
TD 65536
SOLVENT DMSO
NS 32
DS 2
SWH 8223.685 Hz
FIDRES 0.125483 Hz
AQ 3.9846387 sec
RG 101
DW 60.800 usec
DE 6.50 usec
TE 298.3 K
D1 1.00000000 sec
TD0 1
  
```

```

----- CHANNEL f1 -----
NUC1 1H
P1 12.86 usec
PL1 -4.00 dB
PL1W 20.19063568 W
SFO1 400.1324710 MHz
SI 32768
SF 400.1300000 MHz
WDW EM
SSB 0
LB 0.30 Hz
GB 0
PC 1.00
  
```

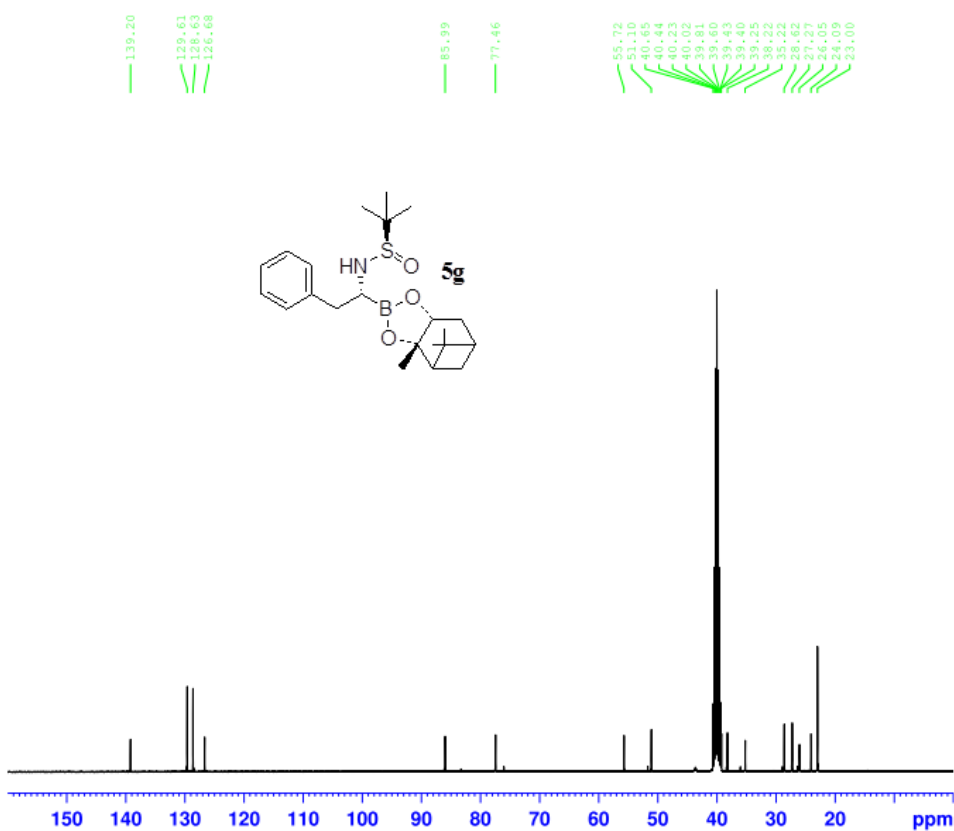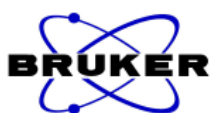

```

NAME wenkun120423-4-C
EXPNO 1
PROCNO 1
Date_ 20120424
Time 2.49
INSTRUM spect
PROBHD 5 mm PABBO BB-
PULPROG zgpg30
TD 65536
SOLVENT DMSO
NS 10240
DS 4
SWH 24038.461 Hz
FIDRES 0.366798 Hz
AQ 1.3631988 sec
RG 1290
DW 20.800 usec
DE 6.50 usec
TE 300.1 K
D1 2.00000000 sec
D11 0.03000000 sec
TD0 1
  
```

```

----- CHANNEL f1 -----
NUC1 13C
P1 10.10 usec
PL1 -3.00 dB
PL1W 64.15196228 W
SFO1 100.6228298 MHz

----- CHANNEL f2 -----
CPDPRG2 waltz16
NUC2 1H
PCPD2 80.00 usec
PL2 4.00 dB
PL12 11.88 dB
PL13 12.00 dB
PL2W 20.19063568 W
PL12W 0.52137470 W
PL13W 0.50716585 W
SFO2 400.1316005 MHz
SI 32768
SF 100.6127690 MHz
WDW EM
SSB 0
LB 1.00 Hz
GB 0
PC 1.40
  
```



7.407  
7.401  
7.392  
7.385  
7.378  
7.362  
7.356  
4.243  
4.239  
4.221  
4.217  
4.209  
4.170  
4.162  
4.146  
4.108  
3.320  
2.516  
2.512  
2.508  
2.503  
2.499  
2.280  
2.185  
1.944  
1.931  
1.917  
1.872  
1.865  
1.859  
1.722  
1.717  
1.714  
1.709  
1.681  
1.678  
1.302  
1.248  
1.217  
1.141  
1.128  
1.101  
0.896  
0.806  
0.006

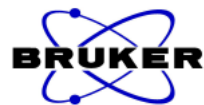

NAME wenkun120418-3-H  
EXPNO 1  
PROCNO 1  
Date\_ 20120418  
Time 13.47  
INSTRUM spect  
PROBHD 5 mm PABBO BB-  
PULPROG zg30  
TD 65536  
SOLVENT DMSO  
NS 32  
DS 2  
SWH 8223.685 Hz  
FIDRES 0.125483 Hz  
AQ 3.9846387 sec  
RG 228  
DW 60.800 usec  
DE 6.50 usec  
TE 298.4 K  
D1 1.00000000 sec  
TD0 1

===== CHANNEL f1 =====  
NUC1 1H  
P1 12.86 usec  
PL1 -4.00 dB  
PL1W 20.19063568 W  
SFO1 400.1324710 MHz  
SI 32768  
SF 400.1300000 MHz  
WDW EM  
SSB 0  
LB 0.30 Hz  
GB 0  
PC 1.00

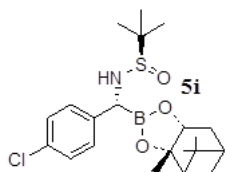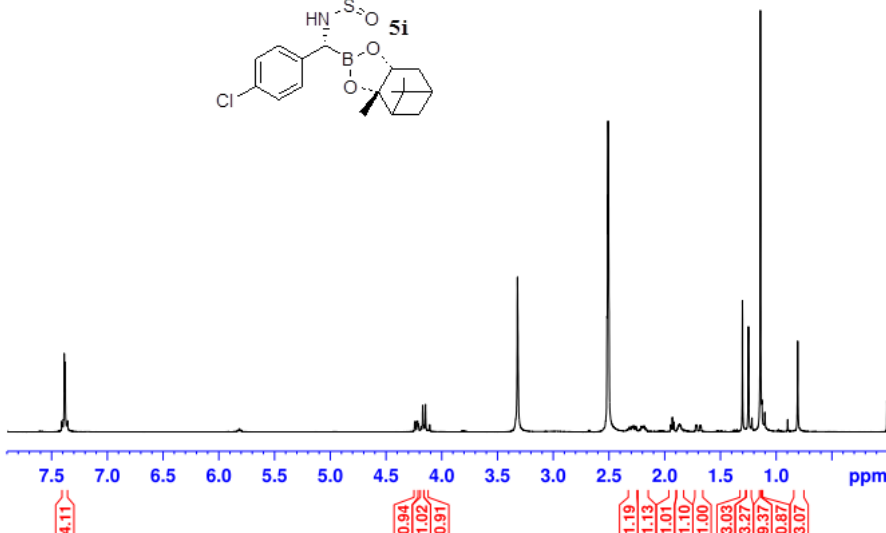

139.47  
131.92  
130.01  
128.58

83.35  
76.11

55.70  
51.76  
47.69  
40.69  
40.39  
40.06  
39.85  
39.44  
38.40  
36.03  
27.39  
26.39  
24.10  
23.14

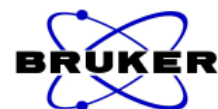

NAME wenkun120418-3-C  
EXPNO 1  
PROCNO 1  
Date\_ 20120418  
Time 14.46  
INSTRUM spect  
PROBHD 5 mm PABBO BB-  
PULPROG zgpg30  
TD 65536  
SOLVENT DMSO  
NS 2227  
DS 4  
SWH 24038.461 Hz  
FIDRES 0.366798 Hz  
AQ 1.3631988 sec  
RG 575  
DW 20.800 usec  
DE 6.50 usec  
TE 301.2 K  
D1 2.00000000 sec  
D11 0.03000000 sec  
TD0 1

===== CHANNEL f1 =====  
NUC1 13C  
P1 10.10 usec  
PL1 -3.00 dB  
PL1W 64.15196228 W  
SFO1 100.6228298 MHz

===== CHANNEL f2 =====  
CPDPRG2 waltz16  
NUC2 1H  
PCPD2 80.00 usec  
PL2 -4.00 dB  
PL12 11.88 dB  
PL13 12.00 dB  
PL2W 20.19063568 W  
PL12W 0.52137470 W  
PL13W 0.50716585 W  
SFO2 400.1316005 MHz  
SI 32768  
SF 100.6127690 MHz  
WDW EM  
SSB 0  
LB 1.00 Hz  
GB 0  
PC 1.40

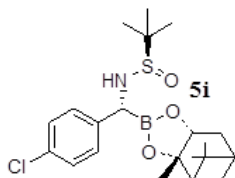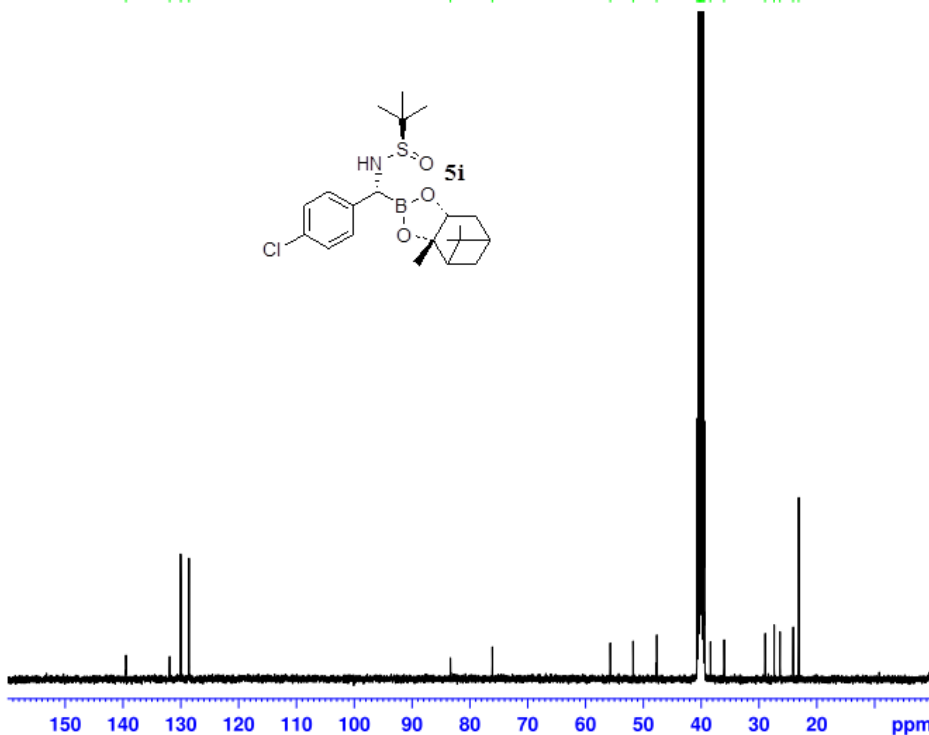



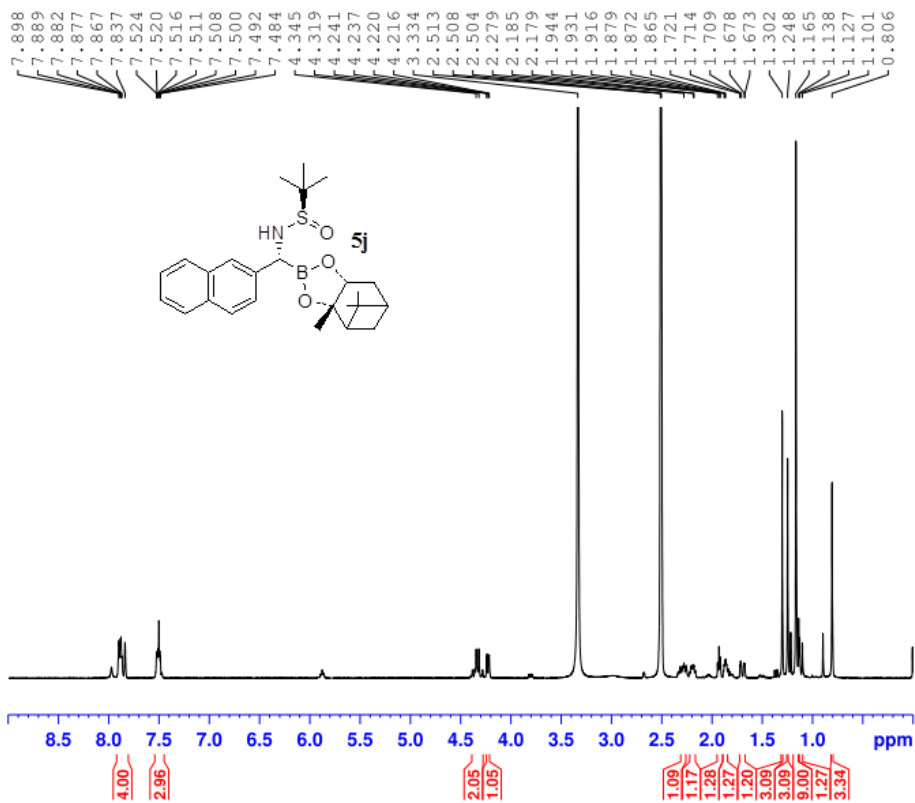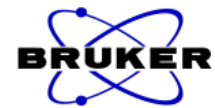

```

NAME      wenkun120419-1-H
EXPNO    1
PROCNO   1
Date_    20120419
Time     16.38
INSTRUM  spect
PROBHD   5 mm PABBO BB-
PULPROG  zg30
TD       65536
SOLVENT  DMSO
NS       32
DS       2
SWH      8223.685 Hz
FIDRES   0.125483 Hz
AQ       3.9846387 sec
RG       144
DW       60.800 usec
DE       6.50 usec
TE       298.5 K
D1       1.00000000 sec
TD0      1

===== CHANNEL f1 =====
NUC1     1H
P1       12.86 usec
PL1      -4.00 dB
PL1W     20.19063568 W
SFO1     400.1324710 MHz
SI       32768
SF       400.1300000 MHz
WDW      EM
SSB      0
LB       0.30 Hz
GB       0
PC       1.00
  
```

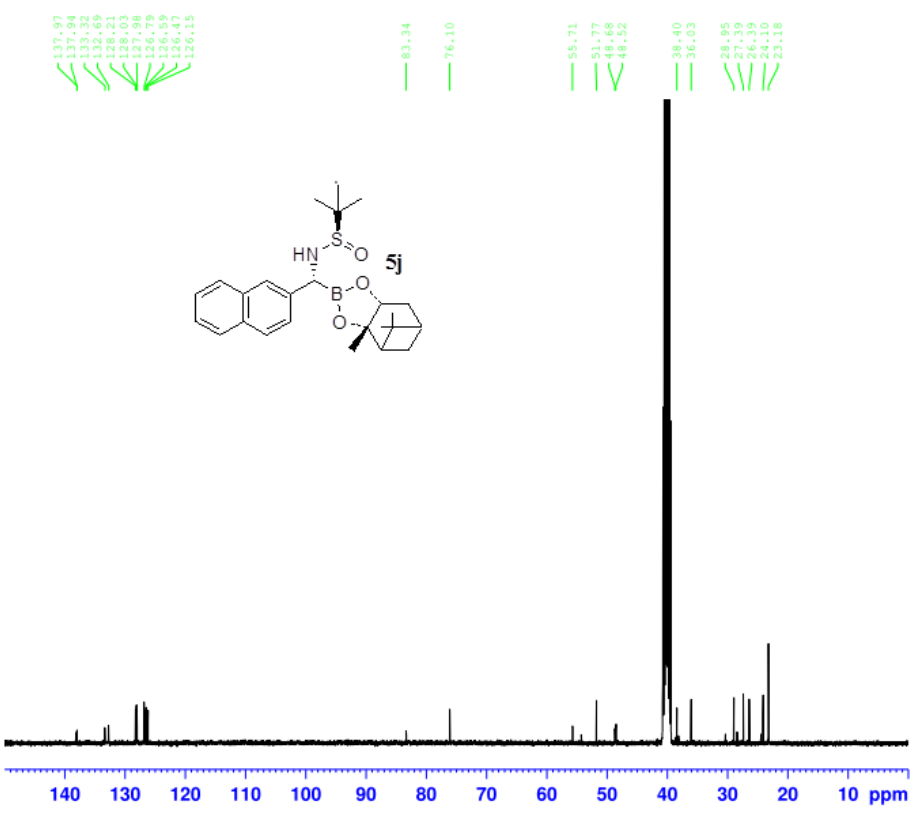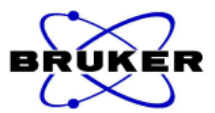

```

NAME      wenkun120419-1-C
EXPNO    1
PROCNO   1
Date_    20120419
Time     18.26
INSTRUM  spect
PROBHD   5 mm PABBO BB-
PULPROG  zgpg30
TD       65536
SOLVENT  DMSO
NS       10240
DS       4
SWH      24038.461 Hz
FIDRES   0.366798 Hz
AQ       1.3631988 sec
RG       40.3
DW       20.800 usec
DE       6.50 usec
TE       301.7 K
D1       2.00000000 sec
D11      0.03000000 sec
TD0      1

===== CHANNEL f1 =====
NUC1     13C
P1       10.10 usec
PL1      -3.00 dB
PL1W     64.15196228 W
SFO1     100.6228298 MHz

===== CHANNEL f2 =====
CPDPRG2  waltz16
NUC2     1H
PCPD2    80.00 usec
PL2      -4.00 dB
PL12     11.88 dB
PL13     12.00 dB
PL2W     20.19063568 W
PL12W    0.52137470 W
PL13W    0.50716585 W
SFO2     400.1316005 MHz
SI       32768
SF       100.6127690 MHz
WDW      EM
SSB      0
LB       1.00 Hz
GB       0
PC       1.40
  
```

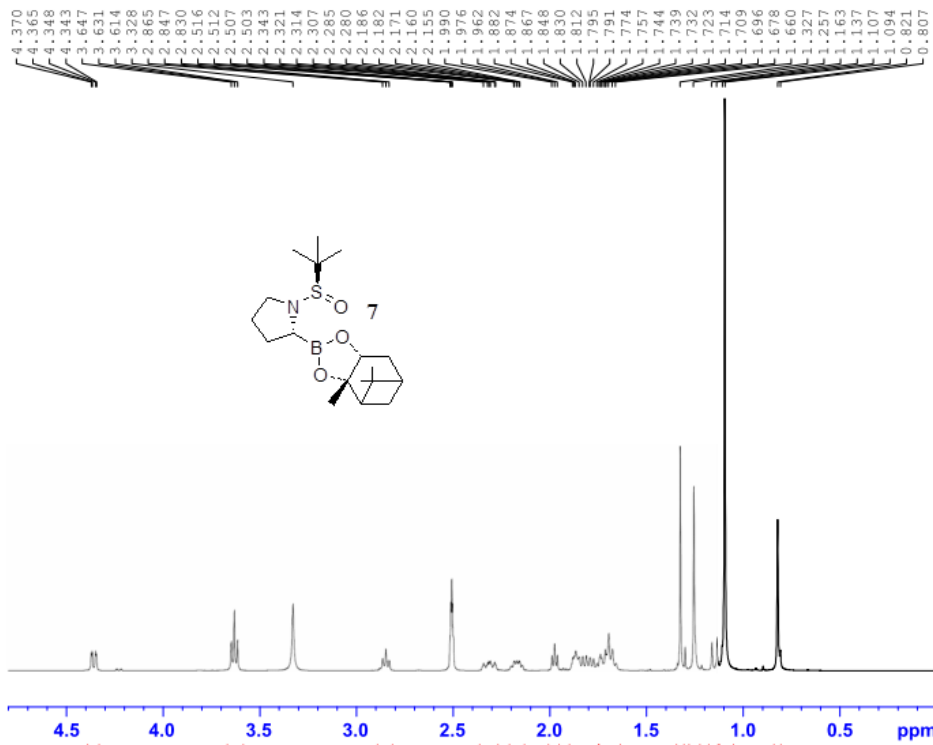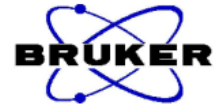

```

NAME wenkun120309-2-H'
EXPNO 3
PROCNO 1
Date_ 20120509
Time 14.54
INSTRUM spect
PROBHD 5 mm PABBO BB-
PULPROG zg30
TD 65536
SOLVENT DMSO
NS 64
DS 2
SWH 8223.685 Hz
FIDRES 0.125483 Hz
AQ 3.9846387 sec
RG 71.8
DW 60.800 usec
DE 6.50 usec
TE 298.1 K
D1 1.00000000 sec
TDO 1

```

```

===== CHANNEL f1 =====
NUC1 1H
P1 12.86 usec
PL1 -4.00 dB
PL1W 20.19063568 W
SFO1 400.1324710 MHz
SI 32768
SF 400.1300000 MHz
EM
SSB 0
LB 0.30 Hz
GB 0
PC 1.00

```

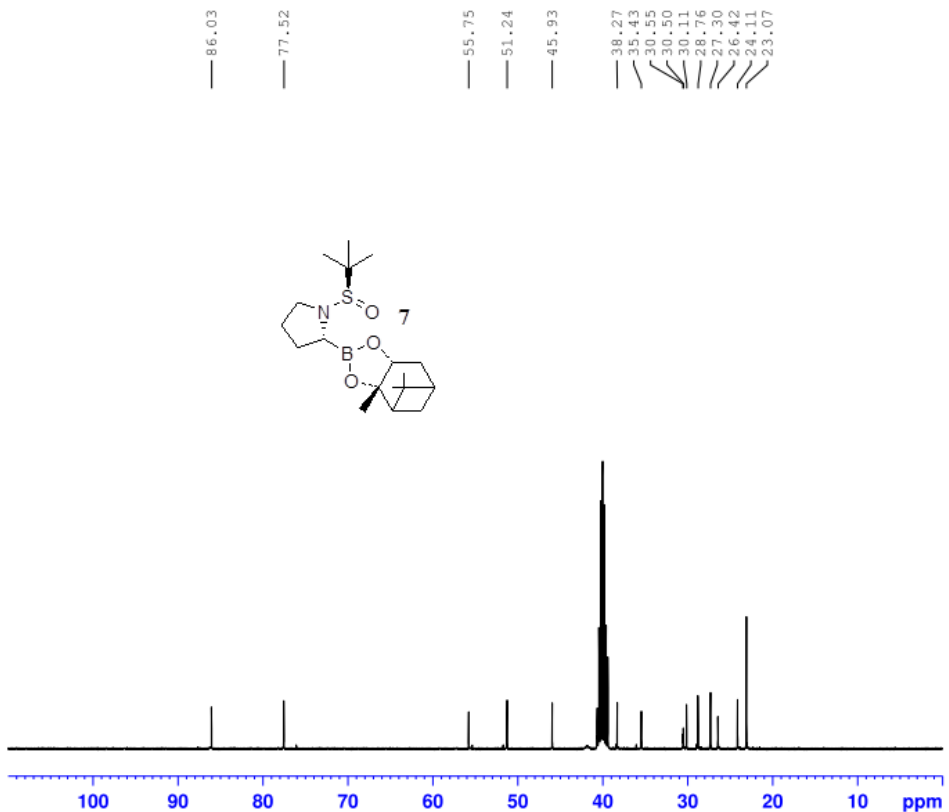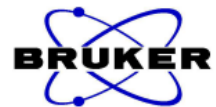

```

NAME wenkun120309-2-C'
EXPNO 3
PROCNO 1
Date_ 20120509
Time 16.01
INSTRUM spect
PROBHD 5 mm PABBO BB-
PULPROG zgpg30
TD 65536
SOLVENT DMSO
NS 1071
DS 4
SWH 24038.461 Hz
FIDRES 0.366798 Hz
AQ 1.3631988 sec
RG 1030
DW 20.800 usec
DE 6.50 usec
TE 300.1 K
D1 2.00000000 sec
D11 0.03000000 sec
TDO 1

```

```

===== CHANNEL f1 =====
NUC1 13C
P1 10.10 usec
PL1 -3.00 dB
PL1W 64.15196228 W
SFO1 100.6228298 MHz

===== CHANNEL f2 =====
CPDPRG2 waltz16
NUC2 1H
PCPD2 80.00 usec
PL2 -4.00 dB
PL12 11.88 dB
PL13 12.00 dB
PL2W 20.19063568 W
PL12W 0.52137470 W
PL13W 0.50716585 W
SFO2 400.1316005 MHz
SI 32768
SF 100.6127690 MHz
EM
SSB 0
LB 1.00 Hz
GB 0
PC 1.40

```

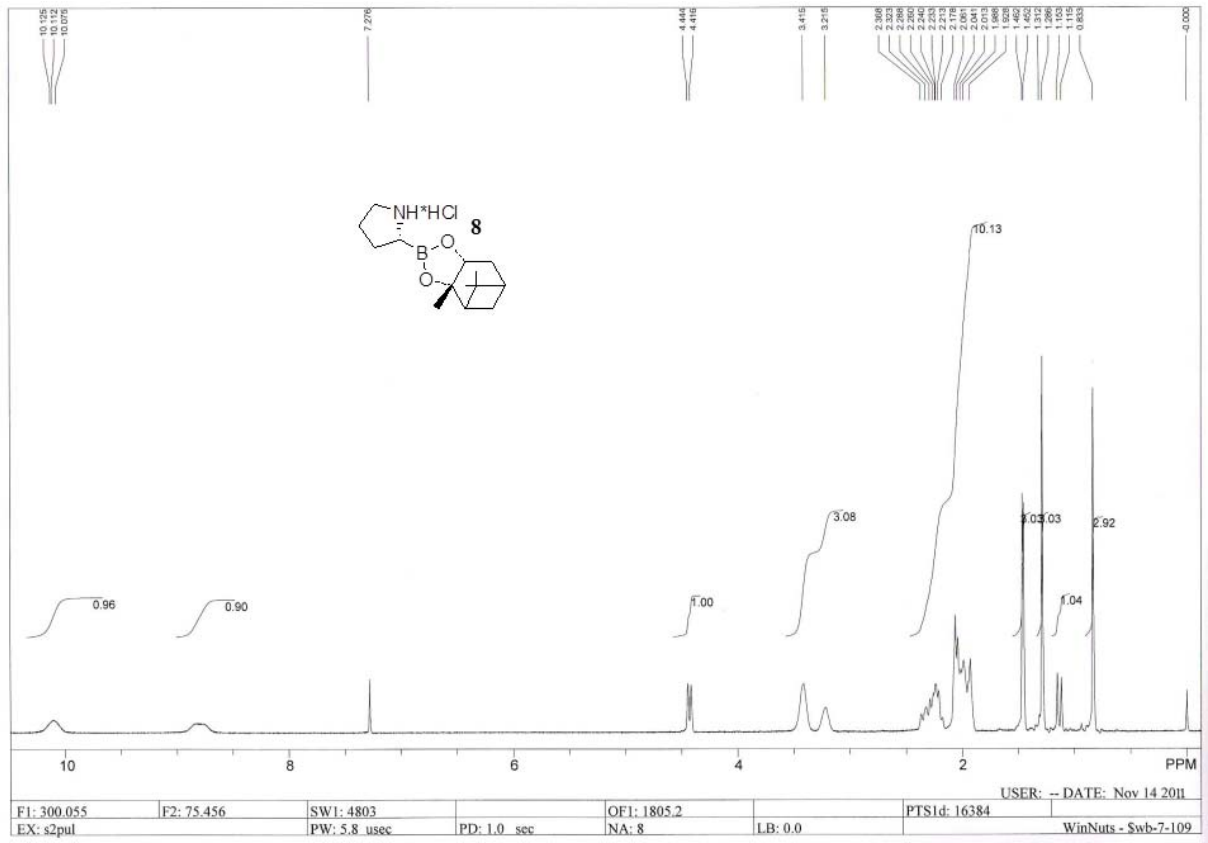

Supplement: c4ra02229g1.pdf [file c4ra02229g1.pdf]
